# Supplementary material for: Impact of early disease factors on metabolic syndrome in systemic lupus erythematosus: data from an international inception cohort
Source: HighWire-hosted journal article supplement (doi:10.1136/annrheumdis-2013-203933), 2014-04-02
Supplement: annrheumdis-2013-203933supp.pdf [file annrheumdis-2013-203933supp.pdf]

**Supplemental Table 1: Univariate associations over time**

| Variable                           | Adjusted Odds Ratio | 95% Confidence Interval |
|------------------------------------|---------------------|-------------------------|
| Age (years)                        | 1.08                | 1.06, 1.11              |
| Male Gender                        | 2.54                | 1.14, 5.65              |
| Previous MetS status (y/n)         | 18.6                | 13.7, 25.4              |
| Indian-subcontinent race/ethnicity | 0.52                | 0.12, 2.21              |
| African ancestry race/ethnicity    | 8.11                | 2.69, 24.4              |
| Afro-Caribbean race/ethnicity      | 0.77                | 0.26, 2.27              |
| Korean race/ethnicity              | 1.32                | 0.56, 3.11              |
| Hispanic race/ethnicity            | 5.17                | 2.28, 11.7              |
| SLEDAI-2K >10 (y/n)                | 2.26                | 1.54, 3.32              |
| SLEDAI-2K (per unit)               | 1.11                | 1.07, 1.16              |
| Low Complement (y/n)               | 0.74                | 0.47, 1.13              |
| High anti-dsDNA (y/n)              | 1.21                | 0.79, 1.86              |
| SLICC/ACR-DI >1 (y/n)              | 7.84                | 4.32, 14.2              |
| Active renal disease**(y/n)        | 7.31                | 4.47, 11.9              |
| Current oral CS (y/n)              | 3.94                | 2.38, 6.55              |
| Average oral CS dose (mg)***       | 1.06                | 1.05, 1.08              |
| Highest oral CS dose (mg)***       | 1.04                | 1.03, 1.05              |
| Cumulative oral CS dose (g)        | 1.11                | 1.07, 1.16              |
| Current IS (y/n)                   | 2.06                | 1.42, 3.00              |
| Current AM (y/n)                   | 0.21                | 0.14, 0.34              |

SLEDAI Systemic Lupus Erythematosus Disease Activity index; SLICC Systemic Lupus Erythematosus; ACR American College of Rheumatology; CS corticosteroid; IV intravenous; IS immunosuppressive; AM antimalarial.

\*\*Defined as haematuria >5 rbc/hpf; pyuria > 5 wbc/hpf; new or recent increase of > 500 mg 24 hour protein; casts including granular or rbc; or consistent renal biopsy; Nephrotic syndrome (proteinuria > 3 grams / 24 hour, oedema, and increased BP). Other causes excluded

\*\*\* Within preceding 12 months

**Supplemental Table 2: Univariate associations of exposures recorded at baseline**

| <b>Variable</b>                             | <b>Adjusted Odds Ratio</b> | <b>95% Confidence Interval</b> |
|---------------------------------------------|----------------------------|--------------------------------|
| SLEDAI-2K >10 at baseline (y/n)             | 3.28                       | 1.89, 5.73                     |
| SLEDAI-2K at baseline (per unit)            | 1.16                       | 1.10, 1.23                     |
| Low Complement at baseline (y/n)            | 0.73                       | 0.40, 1.34                     |
| High anti-dsDNA at baseline (y/n)           | 1.46                       | 0.81, 2.63                     |
| SLICC/ACR-DI >1 at baseline (y/n)           | 7.99                       | 2.74, 23.3                     |
| Active renal disease at baseline<br>**(y/n) | 18.73                      | 9.48, 37.0                     |
| Current oral CS at baseline (y/n)           | 4.57                       | 2.39, 8.76                     |
| Average oral CS dose at baseline<br>(mg)*** | 1.06                       | 1.04, 1.08                     |
| Highest oral CS dose at baseline<br>(mg)*** | 1.07                       | 1.05, 1.09                     |
| Cumulative oral CS dose at baseline<br>(g)  | 1.19                       | 1.11, 1.27                     |
| Current IS at baseline (y/n)                | 8.04                       | 4.53, 14.32                    |
| Current AM at baseline (y/n)                | 0.15                       | 0.09, 0.27                     |

SLEDAI Systemic Lupus Erythematosus Disease Activity index; SLICC Systemic Lupus Erythematosus; ACR American College of Rheumatology; CS corticosteroid; IV intravenous; IS immunosuppressive; AM antimalarial.

\*\*Defined as haematuria >5 rbc/hpf; pyuria > 5 wbc/hpf; new or recent increase of > 500 mg 24 hour protein; casts including granular or rbc; or consistent renal biopsy; Nephrotic syndrome (proteinuria > 3 grams / 24 hour, oedema, and increased BP). Other causes excluded

\*\*\* Within preceding 12 months

**Supplemental Table 3: Univariate associations of exposures recorded over years 1 and 2**

| Variable                                     | Adjusted Odds Ratio | 95% Confidence Interval |
|----------------------------------------------|---------------------|-------------------------|
| SLEDAI-2K >10 over follow-up (y/n)           | 5.87                | 2.80, 12.4              |
| SLEDAI-2K over follow-up (per unit)          | 1.17                | 1.08, 1.26              |
| Low Complement over follow-up (y/n)          | 0.73                | 0.41, 1.47              |
| High anti-dsDNA over follow-up (y/n)         | 0.97                | 0.52, 1.83              |
| SLICC/ACR-DI >1 over follow-up (y/n)         | 13.2                | 6.89, 25.3              |
| Active renal disease over follow-up ** (y/n) | 21.7                | 8.71, 54.1              |
| Current oral CS over follow-up (y/n)         | 4.44                | 2.38, 8.29              |
| Average oral CS dose over follow-up (mg)***  | 1.11                | 1.06, 1.15              |
| Highest oral CS dose over follow-up (mg)***  | 1.03                | 1.01, 1.05              |
| Cumulative oral CS dose over follow-up (g)   | 1.17                | 1.08, 1.27              |
| Current IS over follow-up (y/n)              | 2.64                | 1.47, 4.76              |
| Current AM over follow-up (y/n)              | 0.14                | 0.08, 0.26              |

SLEDAI Systemic Lupus Erythematosus Disease Activity index; SLICC Systemic Lupus Erythematosus; ACR American College of Rheumatology; CS corticosteroid; IV intravenous; IS immunosuppressive; AM antimalarial.

\*\*Defined as haematuria >5 rbc/hpf; pyuria > 5 wbc/hpf; new or recent increase of > 500 mg 24 hour protein; casts including granular or rbc; or consistent renal biopsy; Nephrotic syndrome (proteinuria > 3 grams / 24 hour, oedema, and increased BP). Other causes excluded

\*\*\* Within preceding 12 months

**Supplemental Table 4: Characteristics of patients of Korean and Hispanic ethnicity compared to all other ethnicities over time**

| N (%) or median(IQR)            | Visit | Korean         | Hispanic        | Whole cohort    |
|---------------------------------|-------|----------------|-----------------|-----------------|
| MetS WC                         | Enrol | 33/164 (20.1)  | 129/228 (56.6)  | 645/1333 (48.4) |
|                                 | FU 1  | 30/136 (22.1)  | 64/101 (63.4)   | 467/919 (50.8)  |
|                                 | FU 2  | 19/100 (19.0)  | 55/88 (62.5)    | 359/728 (49.3)  |
| MetS BP                         | Enrol | 74/169 (43.8)  | 117/240 (48.8)  | 686/1489 (46.1) |
|                                 | FU 1  | 64/137 (46.7)  | 59/118 (50.0)   | 516/1065 (48.5) |
|                                 | FU 2  | 49/100 (49.0)  | 52/104 (50.0)   | 452/894 (50.6)  |
| MetS TG                         | Enrol | 100/153 (65.4) | 108/168 (64.3)  | 619/1340 (46.2) |
|                                 | FU 1  | 40/77 (52.6)   | 51/99 (51.5)    | 347/942 (36.8)  |
|                                 | FU 2  | 26/52 (50.0)   | 44/88 (50.0)    | 311/794 (39.2)  |
| MetS HDL                        | Enrol | 110/144 (76.4) | 97/149 (65.1)   | 485/821 (59.1)  |
|                                 | FU 1  | 48/74 (64.9)   | 53/86 (61.6)    | 337/617 (54.6)  |
|                                 | FU 2  | 29/50 (58.0)   | 45/81 (55.6)    | 292/528 (55.3)  |
| MetS Glu                        | Enrol | 45/168 (26.8)  | 41/236 (17.4)   | 271/1342 (20.2) |
|                                 | FU 1  | 26/135 (19.3)  | 10/101 (9.9)    | 136/966 (14.1)  |
|                                 | FU 2  | 25/99 (25.3)   | 8/85 (9.4)      | 108/805 (13.4)  |
| MetS                            | Enrol | 52/169 (30.8)  | 75/240 (31.3)   | 239/1494 (16.0) |
|                                 | FU 1  | 20/137 (14.6)  | 27/118 (22.9)   | 134/1065 (12.6) |
|                                 | FU 2  | 16/100 (16.0)  | 29/104 (27.9)   | 121/894 (13.6)  |
| SLEDAI-2K (mean (SD))           | Enrol | 7.4 (6.1)      | 6.5 (5.8)       | 5.5 (5.4)       |
|                                 | FU 1  | 3.4 (2.6)      | 5.1 (4.9)       | 3.6 (4.0)       |
|                                 | FU 2  | 4.1 (3.8)      | 5.7 (4.6)       | 3.6 (4.1)       |
| SLICC/ACR-DI ≥1                 | Enrol | 9/62 (14.5)    | 20/106 (18.9)   | 117/644 (18.2)  |
|                                 | FU 1  | 17/137 (12.4)  | 41/118 (34.8)   | 290/1054 (27.5) |
|                                 | FU 2  | 16/100 (16.0)  | 42/102 (41.2)   | 270/885 (30.5)  |
| Active renal disease            | Enrol | 49/169 (29.0)  | 102/240 (42.5)  | 342/1489 (23.0) |
|                                 | FU 1  | 17/137 (12.4)  | 46/117 (39.3)   | 164/1053 (15.6) |
|                                 | FU 2  | 10/99 (10.1)   | 50/104 (48.1)   | 119/890 (13.4)  |
| Elevated anti-dsDNA             | Enrol | 105/159 (66.0) | 84/211 (39.8)   | 540/1345 (40.2) |
|                                 | FU 1  | 63/127 (49.6)  | 36/99 (36.4)    | 332/996 (33.3)  |
|                                 | FU 2  | 52/99 (52.5)   | 36/103 (35.0)   | 36/92 (39.1)    |
| On immune-suppressant           | Enrol | 86//169 (50.9) | 146/240 (60.8)  | 597/1492 (40.0) |
|                                 | FU 1  | 67/137 (48.9)  | 68/118 (57.6)   | 451/1065 (42.4) |
|                                 | FU 2  | 54/100 (54.0)  | 59/104 (56.7)   | 388/894 (43.4)  |
| Average daily oral CS dose (mg) | Enrol | 20 (10, 35)    | 30 (15, 42.5)   | 20 (10, 30)     |
|                                 | FU 1  | 10 (7.5, 14.5) | 15 (7.5, 24)    | 10 (7, 16)      |
|                                 | FU 2  | 7.5 (5, 10.5)  | 10 (5, 20)      | 7.5 (5, 12)     |
| Peak daily oral CS dose (mg)    | Enrol | 30 (15, 52.5)  | 50 (30, 60)     | 40 (20, 60)     |
|                                 | FU 1  | 15 (10, 30)    | 30 (15, 50)     | 20 (10, 40)     |
|                                 | FU 2  | 10 (5, 15)     | 15 (6.3, 50)    | 10 (5, 20)      |
| Cumulative CS dose (g)          | Enrol | 1.4 (0.4, 3.1) | 3.9 (1.8, 6.2)  | 2.6 (1.1, 5.0)  |
|                                 | FU 1  | 3.8 (2.7, 5.3) | 6.2 (2.8, 8.7)  | 3.9 (2.5, 6.1)  |
|                                 | FU 2  | 5.7 (3.6, 8.6) | 7.8 (3.9, 14.4) | 5.8 (3.7, 9.0)  |
| IV CS                           | Enrol | 26/169 (15.4)  | 5/223 (2.2)     | 70/1421 (4.9)   |
|                                 | FU 1  | 10/137 (7.3)   | 3/117 (2.6)     | 78/1053 (7.4)   |
|                                 | FU 2  | 4/100 (4.0)    | 1/104 (1.0)     | 42/891 (4.7)    |

SLEDAI Systemic Lupus Erythematosus Disease Activity index; SLICC Systemic Lupus Erythematosus; ACR American College of Rheumatology; CS corticosteroid; IV intravenous
